# Supplementary material for: DrugWAS: Leveraging drug-wide association studies to facilitate drug repurposing for COVID-19
Source: PubMed Central journal article supplement — medRxiv. 2021 Feb 8:2021.02.04.21251169. Preprint. [Version 1] doi: 10.1101/2021.02.04.21251169 (PMC7872383; doi:10.1101/2021.02.04.21251169), 2021-02-08
Supplement: media-1.pdf [file media-1.pdf]

# **DrugWAS: Leveraging drug-wide association studies to facilitate drug repurposing for COVID-19**

## **Supplemental Figures**

**eFigure 1** Strategies for selecting severity groups for COVID-19 outcomes

**eFigure 2** Spline regression analysis showing the OR trends of 49 drug associations across the COVID-19 severity scale (cumulative severity strategy)

**eFigure 3** Spline regression analysis showing the OR trends of 49 drug associations across the COVID-19 severity scale (exclusive severity strategy)

## **Supplemental Tables**

**eTable 1** The number of total, potential, and significant associations conducted for primary and secondary outcomes

**eTable 2** Patient counts for each severity group included in the study

**eTable 3** Association between drug exposure and all-cause of death

**eTable 4** Main patient characteristics by overlap weighting with propensity scores for all drug studies in the primary analysis

**eTable 5** Association between drug exposure and on ventilator (cumulative severity)

**eTable 6** Association between drug exposure and in ICU (cumulative severity)

**eTable 7** Association between drug exposure and hospitalized-mild (cumulative severity)

**eTable 8** Association between drug exposure and on ventilator (exclusive severity)

**eTable 9** Association between drug exposure and in ICU (exclusive severity)

**eTable 10** Association between drug exposure and hospitalized-mild (exclusive severity)

## Supplemental Figures

**eFigure 1** Strategies for selecting severity groups for COVID-19 outcomes. **A.** Cumulative severity strategy for the in ICU outcome includes in the severity group all the patients admitted to ICU or with a more severe outcome (ie, on ventilator or dead). **B.** Exclusive severity for the in ICU outcomes includes in the severity group only the patients admitted to ICU and exclude all the patients with any other outcome.

**A** Cumulative severity

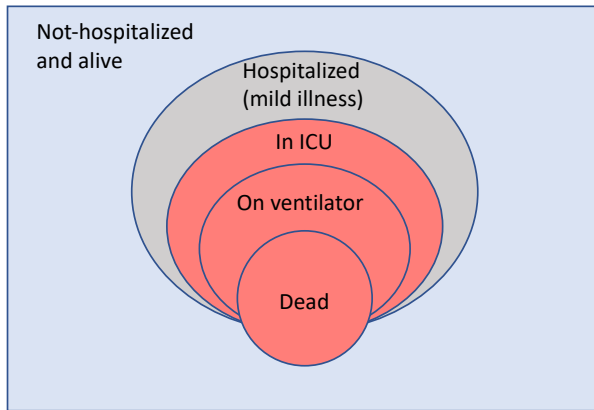

**B** Exclusive severity

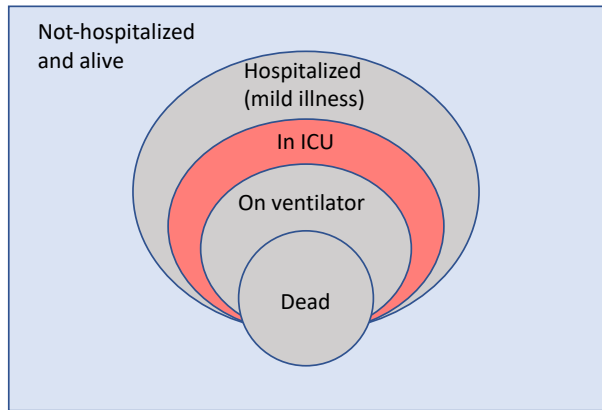

- Included in the severe COVID-19 group
- Included in the non-severe COVID-19 group
- Excluded from the study

**eFigure 2** Spline regression analysis showing the OR trends of 49 drug associations across the COVID-19 severity scale: hospitalized-mild (M), ICU admission (I), on ventilation (V), and death (D). The secondary outcomes were extracted following the cumulative severity strategy.

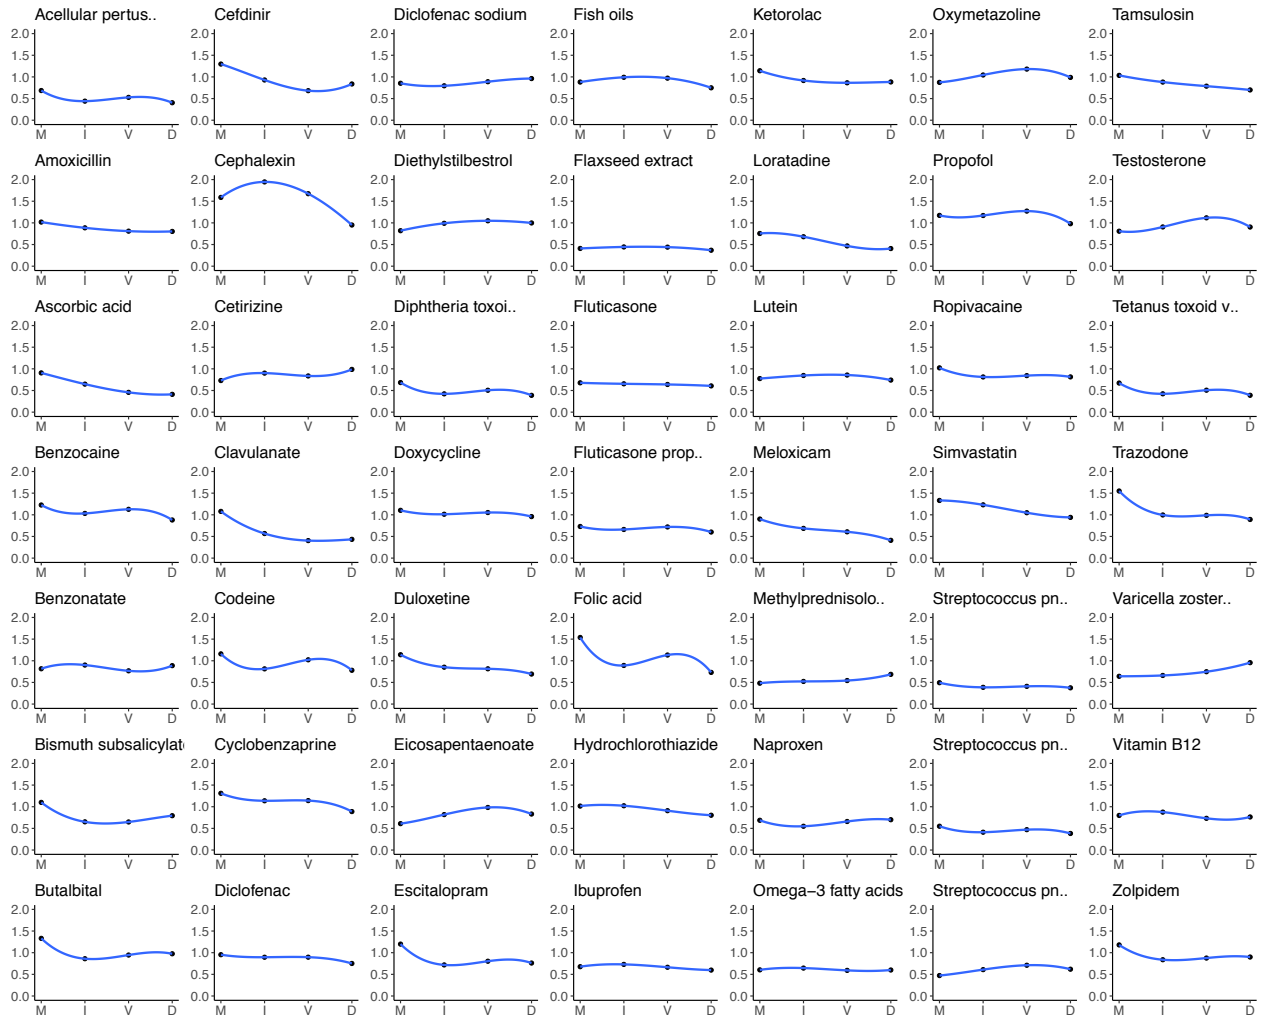

**eFigure 3** Spline regression analysis showing the OR trends of 49 drug associations across the COVID-19 severity scale: hospitalized-mild (M), ICU admission (I), on ventilation (V), and death (D). The secondary outcomes were extracted following the exclusive severity strategy.

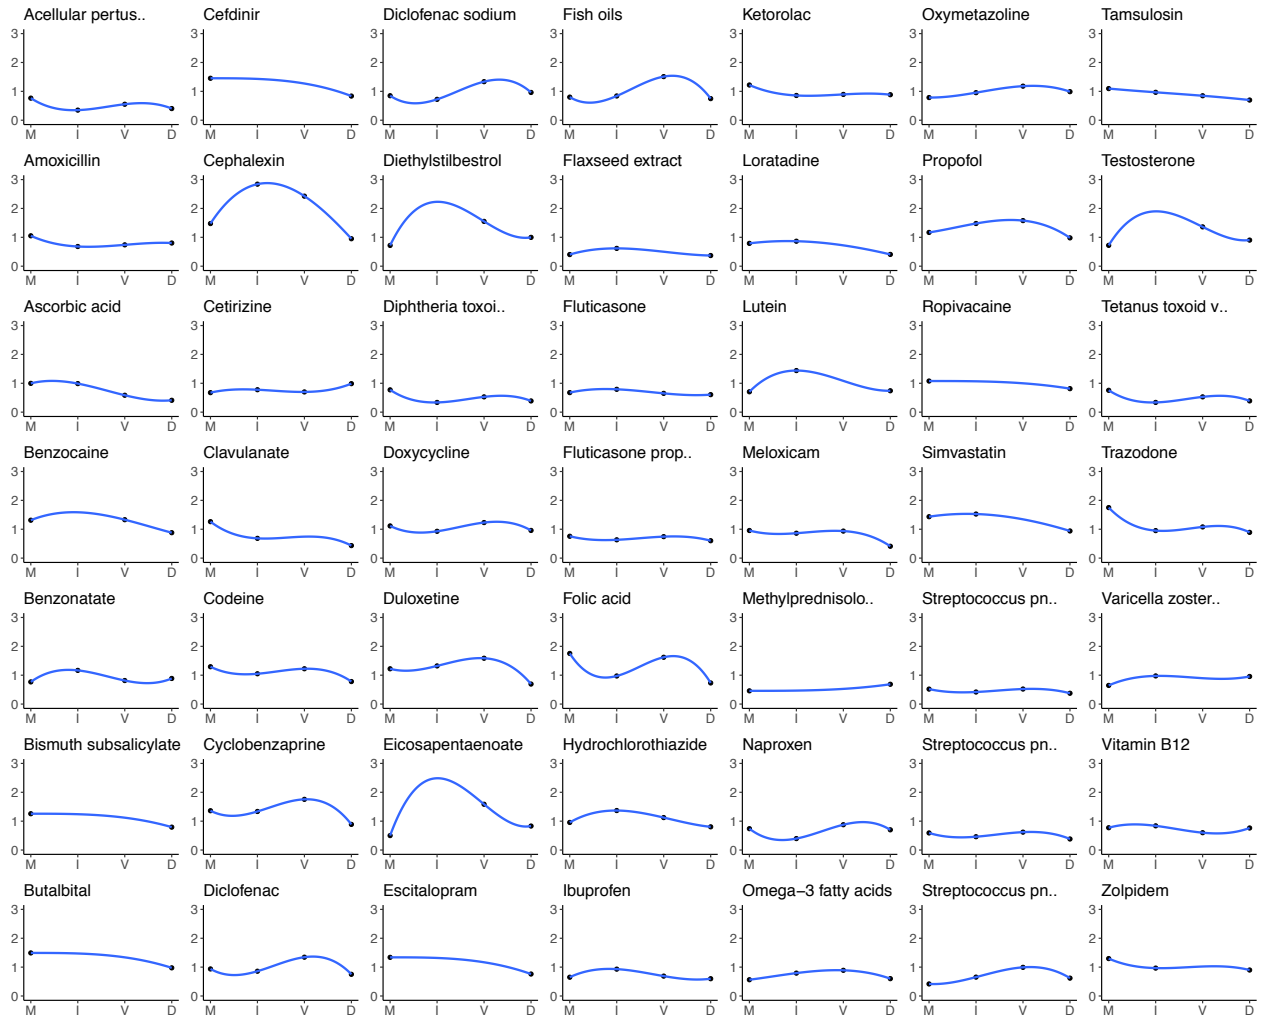

## Supplemental Tables

**eTable 1** The number of total, potential, and significant associations conducted for primary and secondary outcomes.

| Study             | Cumulative severity |           |       | Exclusive severity |           |       |
|-------------------|---------------------|-----------|-------|--------------------|-----------|-------|
|                   | Significant         | Potential | Total | Significant        | Potential | Total |
| Dead              | 4                   | 49        | 233   | 4                  | 49        | 233   |
| On ventilator     | 2                   | 48        | 243   | 0                  | 24        | 198   |
| In ICU            | 5                   | 61        | 261   | 3                  | 45        | 202   |
| Hospitalized-mild | 15                  | 77        | 346   | 10                 | 73        | 331   |

**eTable 2** Patient counts for each severity group included in the study. Notably, the hospitalized-mild cohort extracted using the cumulative severity strategy includes all hospitalized patients (N=509) and the patients who died and did not have an inpatient visit at VUMC after they were diagnosed with SARS-CoV-2 infection (N=11).

| Severity group          | Cumulative severity | Exclusive severity |
|-------------------------|---------------------|--------------------|
| Dead                    | 90                  | 90                 |
| On ventilator           | 114                 | 64                 |
| In ICU                  | 144                 | 82                 |
| Hospitalized-mild       | 520                 | 376                |
| Not hospitalized, alive | 7,248               | 7,248              |

**eTable 3** Association between drug exposure and all-cause of death.

**TCe/u**, total count of drug exposed/unexposed patients; **SRe/u**, severity rate of drug exposed/unexposed patients computed after overlap weighting with propensity score; **OR**, odds ratio; **CI**, confidence interval. The association results are arranged in the ascending order of OR values. The statistically significant results at the 0.05 level are emphasized in bold.

| Drug name                                     | Drug class       | TCe          | TCu          | SRe        | SRu        | OR          | 95% CI               |
|-----------------------------------------------|------------------|--------------|--------------|------------|------------|-------------|----------------------|
| Flaxseed extract                              | supplement       | 186          | 7,152        | 2.7        | 8.4        | 0.37        | (0.11 - 1.21)        |
| <b>*A Streptococcus pneumoniae serotype X</b> | <b>vaccine</b>   | <b>388</b>   | <b>6,950</b> | <b>2.1</b> | <b>4.1</b> | <b>0.38</b> | <b>(0.14 - 0.98)</b> |
| <b>*B Streptococcus pneumoniae serotype X</b> | <b>vaccine</b>   | <b>612</b>   | <b>6,726</b> | <b>1.9</b> | <b>3.6</b> | <b>0.38</b> | <b>(0.17 - 0.89)</b> |
| <b>Diphtheria toxoid vaccine, inactivated</b> | <b>vaccine</b>   | <b>1,166</b> | <b>6,172</b> | <b>0.7</b> | <b>1.7</b> | <b>0.39</b> | <b>(0.15 - 0.98)</b> |
| <b>Tetanus toxoid vaccine, inactivated</b>    | <b>vaccine</b>   | <b>1,169</b> | <b>6,169</b> | <b>0.7</b> | <b>1.7</b> | <b>0.39</b> | <b>(0.15 - 0.98)</b> |
| Acellular pertussis vaccine, inactivated      | vaccine          | 1,119        | 6,219        | 0.8        | 1.7        | 0.4         | (0.16 - 1.02)        |
| Loratadine                                    | antihistamine    | 754          | 6,584        | 0.6        | 1.6        | 0.41        | (0.12 - 1.34)        |
| Meloxicam                                     | NSAID            | 587          | 6,751        | 0.8        | 2.8        | 0.41        | (0.13 - 1.25)        |
| Ascorbic acid                                 | supplement       | 564          | 6,774        | 1.1        | 2.5        | 0.41        | (0.14 - 1.20)        |
| Clavulanate                                   | antibiotic       | 866          | 6,472        | 0.7        | 1.6        | 0.43        | (0.15 - 1.25)        |
| Ibuprofen                                     | NSAID            | 3,508        | 3,830        | 0.8        | 1.4        | 0.6         | (0.30 - 1.19)        |
| Omega-3 fatty acids                           | supplement       | 434          | 6,904        | 2.8        | 4.4        | 0.6         | (0.26 - 1.37)        |
| Fluticasone propionate                        | corticosteroid   | 896          | 6,442        | 1          | 1.6        | 0.6         | (0.23 - 1.55)        |
| Fluticasone                                   | corticosteroid   | 2,154        | 5,184        | 1          | 1.7        | 0.61        | (0.31 - 1.18)        |
| <b>*C Streptococcus pneumoniae type X</b>     | <b>vaccine</b>   | <b>510</b>   | <b>6,828</b> | <b>2.7</b> | <b>4.5</b> | <b>0.62</b> | <b>(0.28 - 1.36)</b> |
| Methylprednisolone acetate                    | corticosteroid   | 399          | 6,939        | 1.2        | 2.4        | 0.69        | (0.20 - 2.33)        |
| Duloxetine                                    | antidepressant   | 292          | 7,046        | 1.6        | 2.6        | 0.69        | (0.20 - 2.40)        |
| Tamsulosin                                    | alpha 1 blocker  | 216          | 7,122        | 4          | 5.8        | 0.7         | (0.25 - 1.96)        |
| Naproxen                                      | NSAID            | 982          | 6,356        | 0.9        | 1.6        | 0.7         | (0.27 - 1.81)        |
| Folic acid                                    | supplement       | 417          | 6,921        | 1.9        | 1.9        | 0.73        | (0.24 - 2.22)        |
| Lutein                                        | supplement       | 147          | 7,191        | 4.3        | 6.5        | 0.74        | (0.23 - 2.35)        |
| Fish oils                                     | supplement       | 437          | 6,901        | 2.4        | 3.3        | 0.75        | (0.31 - 1.81)        |
| Diclofenac                                    | NSAID            | 605          | 6,733        | 1.8        | 2.9        | 0.75        | (0.32 - 1.77)        |
| Escitalopram                                  | antidepressant   | 499          | 6,839        | 1.2        | 1.1        | 0.76        | (0.20 - 2.95)        |
| Vitamin B12                                   | supplement       | 668          | 6,670        | 2.2        | 2.4        | 0.76        | (0.33 - 1.79)        |
| Codeine                                       | opioid           | 342          | 6,996        | 1.8        | 2.9        | 0.78        | (0.25 - 2.43)        |
| Bismuth subsalicylate                         | antidiarrheal    | 171          | 7,167        | 2.8        | 3          | 0.79        | (0.19 - 3.25)        |
| Amoxicillin                                   | antibiotic       | 1,709        | 5,629        | 1          | 1.1        | 0.8         | (0.37 - 1.75)        |
| Hydrochlorothiazide                           | antihypertensive | 707          | 6,631        | 2.5        | 4.2        | 0.8         | (0.39 - 1.64)        |
| Ropivacaine                                   | anesthetic       | 219          | 7,119        | 2.3        | 3.1        | 0.81        | (0.23 - 2.93)        |
| Eicosapentaenoate                             | supplement       | 223          | 7,115        | 2.6        | 3.5        | 0.83        | (0.26 - 2.69)        |
| Cefdinir                                      | antibiotic       | 298          | 7,040        | 1.7        | 1.1        | 0.84        | (0.16 - 4.41)        |
| Benzocaine                                    | anesthetic       | 413          | 6,925        | 1.2        | 1.1        | 0.88        | (0.21 - 3.65)        |
| Ketorolac                                     | NSAID            | 551          | 6,787        | 1.1        | 1.7        | 0.88        | (0.28 - 2.82)        |

|                                       |                          |       |       |     |     |      |               |
|---------------------------------------|--------------------------|-------|-------|-----|-----|------|---------------|
| Benzonatate                           | antitussive              | 635   | 6,703 | 1.8 | 2.3 | 0.89 | (0.37 - 2.14) |
| Cyclobenzaprine                       | skeletal muscle relaxant | 499   | 6,839 | 1.4 | 2   | 0.89 | (0.30 - 2.59) |
| Trazodone                             | antidepressant           | 339   | 6,999 | 2.3 | 2.3 | 0.89 | (0.28 - 2.83) |
| Zolpidem                              | hypnotic                 | 240   | 7,098 | 2   | 3.3 | 0.9  | (0.25 - 3.28) |
| Testosterone                          | androgen                 | 284   | 7,054 | 2   | 2.3 | 0.9  | (0.26 - 3.12) |
| Simvastatin                           | antilipid agent          | 203   | 7,135 | 3.3 | 5.5 | 0.94 | (0.30 - 2.97) |
| Cephalexin                            | antibiotic               | 416   | 6,922 | 1.6 | 1.5 | 0.95 | (0.28 - 3.28) |
| Varicella zoster virus glycoprotein E | vaccine                  | 222   | 7,116 | 2.9 | 5.4 | 0.96 | (0.29 - 3.21) |
| Doxycycline                           | antibiotic               | 693   | 6,645 | 1.8 | 1.9 | 0.96 | (0.40 - 2.29) |
| Diclofenac sodium                     | NSAID                    | 341   | 6,997 | 3   | 3.6 | 0.96 | (0.38 - 2.41) |
| Butalbital                            | barbituate               | 347   | 6,991 | 1.7 | 1.9 | 0.98 | (0.29 - 3.26) |
| Propofol                              | general anesthetic       | 602   | 6,736 | 2   | 2.6 | 0.98 | (0.42 - 2.32) |
| Cetirizine                            | antihistamine            | 1,388 | 5,950 | 1.1 | 1.2 | 0.99 | (0.44 - 2.22) |
| Oxymetazoline                         | adrenergic agonist agent | 1,143 | 6,195 | 1.5 | 1.3 | 0.99 | (0.45 - 2.20) |
| Diethylstilbestrol                    | estrogen                 | 172   | 7,166 | 4.5 | 5.7 | 1    | (0.33 - 2.98) |

Other abbreviations and acronyms. \*A Streptococcus pneumoniae serotype X: Streptococcus pneumoniae serotype (1, 19A, 3, 5, 6A, 7F) capsular antigen diphtheria CRM197 protein conjugate vaccine; \*B Streptococcus pneumoniae serotype X: Streptococcus pneumoniae serotype (14, 18C, 19F, 23F, 4, 6B, 9V) capsular antigen diphtheria CRM197 protein conjugate vaccine; \*C Streptococcus pneumoniae type X: Streptococcus pneumoniae type (1, 10A, 11A, 12F, 14, 15B, 17F, 18C, 19A, 19F, 2, 20, 22F, 23F, 3, 33F, 4, 5, 6B, 7F, 8, 9N, 9V) capsular polysaccharide antigen; NSAID: nonsteroidal anti-inflammatory drug.

**eTable 4** Main patient characteristics by overlap weighting with propensity scores for all drug studies in the primary analysis.

| Drug name                                | Drug exposed | Patient count | Male, % | White, % | Black, % | Not Hispanic or Latino, % |
|------------------------------------------|--------------|---------------|---------|----------|----------|---------------------------|
| Flaxseed extract                         | yes          | 186           | 43.6    | 92.1     | 7.9      | 97.5                      |
|                                          | no           | 7,152         | 43.6    | 92.1     | 7.9      | 97.5                      |
| *A Streptococcus pneumoniae serotype X   | yes          | 388           | 42.8    | 83.8     | 12       | 94.4                      |
|                                          | no           | 6,950         | 42.8    | 83.8     | 12       | 94.4                      |
| *B Streptococcus pneumoniae serotype X   | yes          | 612           | 44.8    | 81.7     | 14.5     | 95.3                      |
|                                          | no           | 6,726         | 44.8    | 81.7     | 14.5     | 95.3                      |
| Diphtheria toxoid vaccine, inactivated   | yes          | 1,166         | 38.1    | 82.2     | 14.1     | 95.6                      |
|                                          | no           | 6,172         | 38.1    | 82.2     | 14.1     | 95.6                      |
| Tetanus toxoid vaccine, inactivated      | yes          | 1,169         | 38.2    | 82.2     | 14.1     | 95.6                      |
|                                          | no           | 6,169         | 38.2    | 82.2     | 14.1     | 95.6                      |
| Acellular pertussis vaccine, inactivated | yes          | 1,119         | 37.8    | 81.8     | 14.5     | 95.7                      |
|                                          | no           | 6,219         | 37.8    | 81.8     | 14.5     | 95.7                      |
| Loratadine                               | yes          | 754           | 35.3    | 85.5     | 11.5     | 95.9                      |
|                                          | no           | 6,584         | 35.3    | 85.5     | 11.5     | 95.9                      |
| Meloxicam                                | yes          | 587           | 33.3    | 86       | 12.4     | 97.2                      |
|                                          | no           | 6,751         | 33.3    | 86       | 12.4     | 97.2                      |
| Ascorbic acid                            | yes          | 564           | 32.4    | 87.4     | 9.9      | 97.1                      |
|                                          | no           | 6,774         | 32.4    | 87.4     | 9.9      | 97.1                      |
| Clavulanate                              | yes          | 866           | 33.7    | 86.3     | 12.1     | 96.9                      |
|                                          | no           | 6,472         | 33.7    | 86.3     | 12.1     | 96.9                      |
| Ibuprofen                                | yes          | 3,508         | 37.6    | 85.1     | 12.3     | 96.6                      |
|                                          | no           | 3,830         | 37.6    | 85.1     | 12.3     | 96.6                      |
| Omega-3 fatty acids                      | yes          | 434           | 43.1    | 91       | 6.7      | 97.3                      |
|                                          | no           | 6,904         | 43.1    | 91       | 6.7      | 97.3                      |
| Fluticasone propionate                   | yes          | 896           | 36.4    | 83.8     | 14.3     | 96                        |
|                                          | no           | 6,442         | 36.4    | 83.8     | 14.3     | 96                        |
| Fluticasone                              | yes          | 2,154         | 38      | 85.2     | 12.7     | 96.6                      |
|                                          | no           | 5,184         | 38      | 85.2     | 12.7     | 96.6                      |
| *C Streptococcus pneumoniae type X       | yes          | 510           | 41.9    | 82.4     | 15.7     | 96.9                      |
|                                          | no           | 6,828         | 41.9    | 82.4     | 15.7     | 96.9                      |
| Methylprednisolone acetate               | yes          | 399           | 34.3    | 86.4     | 11.8     | 96.3                      |
|                                          | no           | 6,939         | 34.3    | 86.4     | 11.8     | 96.3                      |
| Duloxetine                               | yes          | 292           | 25.6    | 90.9     | 8.4      | 98.2                      |
|                                          | no           | 7,046         | 25.6    | 90.9     | 8.4      | 98.2                      |
| Tamsulosin                               | yes          | 216           | 91.5    | 91.8     | 7.6      | 96.6                      |
|                                          | no           | 7,122         | 91.5    | 91.8     | 7.6      | 96.6                      |



|                       |     |       |      |      |      |      |
|-----------------------|-----|-------|------|------|------|------|
| Naproxen              | yes | 982   | 33   | 83.5 | 14.5 | 96   |
|                       | no  | 6,356 | 33   | 83.5 | 14.5 | 96   |
| Folic acid            | yes | 417   | 24.1 | 82.8 | 15.2 | 96.8 |
|                       | no  | 6,921 | 24.1 | 82.8 | 15.2 | 96.8 |
| Lutein                | yes | 147   | 39.2 | 95.7 | 2.9  | 97.8 |
|                       | no  | 7,191 | 39.2 | 95.7 | 2.9  | 97.8 |
| Fish oils             | yes | 437   | 40.9 | 90.1 | 7.4  | 98.1 |
|                       | no  | 6,901 | 40.9 | 90.1 | 7.4  | 98.1 |
| Diclofenac            | yes | 605   | 35.9 | 81.1 | 16.7 | 96.3 |
|                       | no  | 6,733 | 35.9 | 81.1 | 16.7 | 96.3 |
| Escitalopram          | yes | 499   | 28.9 | 91.1 | 7.9  | 98.5 |
|                       | no  | 6,839 | 28.9 | 91.1 | 7.9  | 98.5 |
| Vitamin B12           | yes | 668   | 28.8 | 85.4 | 12.1 | 97   |
|                       | no  | 6,670 | 28.8 | 85.4 | 12.1 | 97   |
| Codeine               | yes | 342   | 25.2 | 90.3 | 9.4  | 98.4 |
|                       | no  | 6,996 | 25.2 | 90.3 | 9.4  | 98.4 |
| Bismuth subsalicylate | yes | 171   | 44.2 | 83.7 | 14.5 | 97.1 |
|                       | no  | 7,167 | 44.2 | 83.7 | 14.5 | 97.1 |
| Amoxicillin           | yes | 1,709 | 35.2 | 85.7 | 12   | 96.3 |
|                       | no  | 5,629 | 35.2 | 85.7 | 12   | 96.3 |
| Hydrochlorothiazide   | yes | 707   | 41.5 | 79.9 | 18.2 | 98.3 |
|                       | no  | 6,631 | 41.5 | 79.9 | 18.2 | 98.3 |
| Ropivacaine           | yes | 219   | 28.1 | 86.3 | 13.3 | 96.8 |
|                       | no  | 7,119 | 28.1 | 86.3 | 13.3 | 96.8 |
| Eicosapentaenoate     | yes | 223   | 39.4 | 87.4 | 10   | 97.3 |
|                       | no  | 7,115 | 39.4 | 87.4 | 10   | 97.3 |
| Cefdinir              | yes | 298   | 32.1 | 86.2 | 10.2 | 97.9 |
|                       | no  | 7,040 | 32.1 | 86.2 | 10.2 | 97.9 |
| Benzocaine            | yes | 413   | 30.2 | 87.9 | 10.3 | 94.4 |
|                       | no  | 6,925 | 30.2 | 87.9 | 10.3 | 94.4 |
| Ketorolac             | yes | 551   | 31.3 | 81.3 | 17   | 95.9 |
|                       | no  | 6,787 | 31.3 | 81.3 | 17   | 95.9 |
| Benzonatate           | yes | 635   | 32.6 | 85.5 | 12   | 96.1 |
|                       | no  | 6,703 | 32.6 | 85.5 | 12   | 96.1 |
| Cyclobenzaprine       | yes | 499   | 27.3 | 82.5 | 16.3 | 96.4 |
|                       | no  | 6,839 | 27.3 | 82.5 | 16.3 | 96.4 |
| Trazodone             | yes | 339   | 30.7 | 87.6 | 10.6 | 98.5 |
|                       | no  | 6,999 | 30.7 | 87.6 | 10.6 | 98.5 |
| Zolpidem              | yes | 240   | 33.9 | 94.8 | 4.3  | 98.7 |

|                                       |     |       |      |      |      |      |
|---------------------------------------|-----|-------|------|------|------|------|
|                                       | no  | 7,098 | 33.9 | 94.8 | 4.3  | 98.7 |
| Testosterone                          | yes | 284   | 60.3 | 87.9 | 10.6 | 97.1 |
|                                       | no  | 7,054 | 60.3 | 87.9 | 10.6 | 97.1 |
| Simvastatin                           | yes | 203   | 52.1 | 91.2 | 7.3  | 97.7 |
|                                       | no  | 7,135 | 52.1 | 91.2 | 7.3  | 97.7 |
| Cephalexin                            | yes | 416   | 33.2 | 88.3 | 10.5 | 97.8 |
|                                       | no  | 6,922 | 33.2 | 88.3 | 10.5 | 97.8 |
| Varicella zoster virus glycoprotein E | yes | 222   | 39.6 | 84.7 | 11.5 | 98.6 |
|                                       | no  | 7,116 | 39.6 | 84.7 | 11.5 | 98.6 |
| Doxycycline                           | yes | 693   | 36.4 | 87.9 | 10.7 | 97.6 |
|                                       | no  | 6,645 | 36.4 | 87.9 | 10.7 | 97.6 |
| Diclofenac sodium                     | yes | 341   | 30.6 | 82.1 | 15.6 | 97.3 |
|                                       | no  | 6,997 | 30.6 | 82.1 | 15.6 | 97.3 |
| Butalbital                            | yes | 347   | 28.2 | 81.2 | 15.7 | 97.1 |
|                                       | no  | 6,991 | 28.2 | 81.2 | 15.7 | 97.1 |
| Propofol                              | yes | 602   | 42.5 | 84.7 | 12.8 | 96.8 |
|                                       | no  | 6,736 | 42.5 | 84.7 | 12.8 | 96.8 |
| Cetirizine                            | yes | 1,388 | 37.5 | 83.6 | 13.6 | 96   |
|                                       | no  | 5,950 | 37.5 | 83.6 | 13.6 | 96   |
| Oxymetazoline                         | yes | 1,143 | 39.6 | 85.9 | 11.5 | 96.3 |
|                                       | no  | 6,195 | 39.6 | 85.9 | 11.5 | 96.3 |
| Diethylstilbestrol                    | yes | 172   | 43.4 | 91.6 | 6.7  | 97   |
|                                       | no  | 7,166 | 43.4 | 91.6 | 6.7  | 97   |

Other abbreviations and acronyms. \*A Streptococcus pneumoniae serotype X: Streptococcus pneumoniae serotype (1, 19A, 3, 5, 6A, 7F) capsular antigen diphtheria CRM197 protein conjugate vaccine; \*B Streptococcus pneumoniae serotype X: Streptococcus pneumoniae serotype (14, 18C, 19F, 23F, 4, 6B, 9V) capsular antigen diphtheria CRM197 protein conjugate vaccine; \*C Streptococcus pneumoniae type X: Streptococcus pneumoniae type (1, 10A, 11A, 12F, 14, 15B, 17F, 18C, 19A, 19F, 2, 20, 22F, 23F, 3, 33F, 4, 5, 6B, 7F, 8, 9N, 9V) capsular polysaccharide antigen.

**eTable 5** Association between drug exposure and on ventilator (cumulative severity).

**TCe/u**, total count of drug exposed/unexposed patients; **SRe/u**, severity rate of drug exposed/unexposed patients computed after overlap weighting with propensity score; **OR**, odds ratio; **CI**, confidence interval. The association results are arranged in the ascending order of OR values. The statistically significant results at the 0.05 level are emphasized in bold.

| Drug name                                     | Drug class      | TCe        | TCu          | SRe        | SRu        | OR          | 95% CI               |
|-----------------------------------------------|-----------------|------------|--------------|------------|------------|-------------|----------------------|
| Clavulanate                                   | antibiotic      | 867        | 6,495        | 0.8        | 2          | 0.4         | (0.15 - 1.07)        |
| <b>*A Streptococcus pneumoniae serotype X</b> | <b>vaccine</b>  | <b>390</b> | <b>6,972</b> | <b>2.6</b> | <b>4.7</b> | <b>0.41</b> | <b>(0.17 - 0.99)</b> |
| Sildenafil                                    | PDE5 inhibitor  | 180        | 7,182        | 2.6        | 6.9        | 0.42        | (0.12 - 1.41)        |
| Flaxseed extract                              | supplement      | 188        | 7,174        | 3.8        | 9.2        | 0.44        | (0.16 - 1.24)        |
| Ascorbic acid                                 | supplement      | 566        | 6,796        | 1.4        | 2.9        | 0.46        | (0.18 - 1.17)        |
| Loratadine                                    | antihistamine   | 756        | 6,606        | 0.9        | 1.9        | 0.47        | (0.17 - 1.29)        |
| <b>*B Streptococcus pneumoniae serotype X</b> | <b>vaccine</b>  | <b>617</b> | <b>6,745</b> | <b>2.5</b> | <b>4.1</b> | <b>0.47</b> | <b>(0.22 - 0.99)</b> |
| Diphtheria toxoid vaccine, inactivated        | vaccine         | 1,171      | 6,191        | 1.1        | 2          | 0.51        | (0.23 - 1.09)        |
| Tetanus toxoid vaccine, inactivated           | vaccine         | 1,174      | 6,188        | 1.1        | 2          | 0.51        | (0.23 - 1.10)        |
| Acellular pertussis vaccine, inactivated      | vaccine         | 1,124      | 6,238        | 1.2        | 2          | 0.53        | (0.24 - 1.15)        |
| Methylprednisolone acetate                    | corticosteroid  | 399        | 6,963        | 1.2        | 2.8        | 0.54        | (0.17 - 1.76)        |
| Omega-3 fatty acids                           | supplement      | 436        | 6,926        | 3.3        | 5.1        | 0.59        | (0.27 - 1.27)        |
| Meloxicam                                     | NSAID           | 591        | 6,771        | 1.5        | 3.2        | 0.61        | (0.25 - 1.50)        |
| Pseudoephedrine                               | decongestant    | 952        | 6,410        | 0.6        | 1.5        | 0.61        | (0.21 - 1.79)        |
| Fluticasone                                   | corticosteroid  | 2,161      | 5,201        | 1.3        | 2.1        | 0.64        | (0.35 - 1.16)        |
| Bismuth subsalicylate                         | antidiarrheal   | 171        | 7,191        | 2.8        | 3.6        | 0.65        | (0.17 - 2.48)        |
| Naproxen                                      | NSAID           | 984        | 6,378        | 1.1        | 2          | 0.66        | (0.28 - 1.54)        |
| Ibuprofen                                     | NSAID           | 3,518      | 3,844        | 1.1        | 1.7        | 0.66        | (0.37 - 1.20)        |
| Cefdinir                                      | antibiotic      | 298        | 7,064        | 1.7        | 1.4        | 0.68        | (0.15 - 3.20)        |
| <b>*C Streptococcus pneumoniae type X</b>     | <b>vaccine</b>  | <b>515</b> | <b>6,847</b> | <b>3.5</b> | <b>5</b>   | <b>0.71</b> | <b>(0.35 - 1.45)</b> |
| Fluticasone propionate                        | corticosteroid  | 900        | 6,462        | 1.4        | 2          | 0.72        | (0.32 - 1.62)        |
| Vitamin B12                                   | supplement      | 670        | 6,692        | 2.4        | 2.9        | 0.73        | (0.34 - 1.60)        |
| Varicella zoster virus glycoprotein E         | vaccine         | 222        | 7,140        | 2.9        | 6.1        | 0.75        | (0.24 - 2.37)        |
| Benzonatate                                   | antitussive     | 636        | 6,726        | 2          | 2.8        | 0.77        | (0.34 - 1.75)        |
| Tamsulosin                                    | alpha 1 blocker | 219        | 7,143        | 5.5        | 6.9        | 0.79        | (0.32 - 1.94)        |
| Escitalopram                                  | antidepressant  | 500        | 6,862        | 1.4        | 1.4        | 0.8         | (0.24 - 2.67)        |
| Azelastine                                    | antihistamine   | 482        | 6,880        | 2          | 2.8        | 0.81        | (0.32 - 2.04)        |
| Amoxicillin                                   | antibiotic      | 1,713      | 5,649        | 1.3        | 1.4        | 0.81        | (0.41 - 1.62)        |
| Duloxetine                                    | antidepressant  | 294        | 7,068        | 2.3        | 3          | 0.81        | (0.27 - 2.42)        |
| Ranitidine                                    | antacid         | 252        | 7,110        | 1.9        | 2.4        | 0.81        | (0.22 - 3.00)        |
| Tetracaine                                    | anesthetic      | 200        | 7,162        | 2.5        | 2.6        | 0.82        | (0.21 - 3.15)        |
| Cetirizine                                    | antihistamine   | 1,390      | 5,972        | 1.3        | 1.6        | 0.84        | (0.40 - 1.74)        |
| Ropivacaine                                   | anesthetic      | 220        | 7,142        | 2.7        | 3.6        | 0.84        | (0.26 - 2.75)        |
| Valacyclovir                                  | antiviral       | 453        | 6,909        | 1.3        | 2          | 0.85        | (0.26 - 2.70)        |

|                     |                  |     |       |     |     |      |               |
|---------------------|------------------|-----|-------|-----|-----|------|---------------|
| Lutein              | supplement       | 149 | 7,213 | 5.6 | 7.3 | 0.86 | (0.30 - 2.44) |
| Ketorolac           | NSAID            | 553 | 6,809 | 1.4 | 2   | 0.86 | (0.31 - 2.38) |
| Zolpidem            | hypnotic         | 241 | 7,121 | 2.4 | 3.8 | 0.88 | (0.27 - 2.88) |
| Diclofenac sodium   | NSAID            | 342 | 7,020 | 3.3 | 4.2 | 0.89 | (0.37 - 2.12) |
| Diclofenac          | NSAID            | 610 | 6,752 | 2.6 | 3.4 | 0.9  | (0.42 - 1.90) |
| Hydrochlorothiazide | antihypertensive | 714 | 6,648 | 3.5 | 4.8 | 0.91 | (0.48 - 1.70) |
| Ketoconazole        | antifungal       | 230 | 7,132 | 2.1 | 2.1 | 0.94 | (0.24 - 3.79) |
| Butalbital          | barbituate       | 348 | 7,014 | 2   | 2.3 | 0.95 | (0.32 - 2.84) |
| Losartan            | antihypertensive | 464 | 6,898 | 3.8 | 5   | 0.95 | (0.46 - 1.98) |
| Fish oils           | supplement       | 442 | 6,920 | 3.5 | 3.8 | 0.97 | (0.45 - 2.11) |
| Tropicamide         | ophthalmic agent | 352 | 7,010 | 3.2 | 3.2 | 0.97 | (0.38 - 2.47) |
| Eicosapentaenoate   | supplement       | 225 | 7,137 | 3.5 | 4   | 0.98 | (0.34 - 2.83) |
| Trazodone           | antidepressant   | 341 | 7,021 | 2.8 | 2.8 | 0.99 | (0.36 - 2.71) |
| Methylprednisolone  | corticosteroid   | 876 | 6,486 | 2.1 | 2.5 | 1    | (0.48 - 2.04) |

Other abbreviations and acronyms. \*A Streptococcus pneumoniae serotype X: Streptococcus pneumoniae serotype (1, 19A, 3, 5, 6A, 7F) capsular antigen diphtheria CRM197 protein conjugate vaccine; \*B Streptococcus pneumoniae serotype X: Streptococcus pneumoniae serotype (14, 18C, 19F, 23F, 4, 6B, 9V) capsular antigen diphtheria CRM197 protein conjugate vaccine; \*C Streptococcus pneumoniae type X: Streptococcus pneumoniae type (1, 10A, 11A, 12F, 14, 15B, 17F, 18C, 19A, 19F, 2, 20, 22F, 23F, 3, 33F, 4, 5, 6B, 7F, 8, 9N, 9V) capsular polysaccharide antigen; NSAID: nonsteroidal anti-inflammatory drug; PDE5 inhibitor: phosphodiesterase type 5 inhibitor.

**eTable 6** Association between drug exposure and in ICU (cumulative severity).

**TCe/u**, total count of drug exposed/unexposed patients; **SRe/u**, severity rate of drug exposed/unexposed patients computed after overlap weighting with propensity score; **OR**, odds ratio; **CI**, confidence interval. The association results are arranged in the ascending order of OR values. The statistically significant results at the 0.05 level are emphasized in bold.

| Drug name                                       | Drug class     | TCe          | TCu          | SRe        | SRu        | OR          | 95% CI               |
|-------------------------------------------------|----------------|--------------|--------------|------------|------------|-------------|----------------------|
| <b>*A Streptococcus pneumoniae serotype X</b>   | <b>vaccine</b> | <b>391</b>   | <b>7,001</b> | <b>2.8</b> | <b>5.4</b> | <b>0.39</b> | <b>(0.17 - 0.89)</b> |
| <b>*B Streptococcus pneumoniae serotype X</b>   | <b>vaccine</b> | <b>618</b>   | <b>6,774</b> | <b>2.7</b> | <b>4.9</b> | <b>0.41</b> | <b>(0.20 - 0.83)</b> |
| <b>Diphtheria toxoid vaccine, inactivated</b>   | <b>vaccine</b> | <b>1,172</b> | <b>6,220</b> | <b>1.2</b> | <b>2.6</b> | <b>0.42</b> | <b>(0.21 - 0.87)</b> |
| <b>Tetanus toxoid vaccine, inactivated</b>      | <b>vaccine</b> | <b>1,175</b> | <b>6,217</b> | <b>1.2</b> | <b>2.6</b> | <b>0.42</b> | <b>(0.21 - 0.87)</b> |
| <b>Acellular pertussis vaccine, inactivated</b> | <b>vaccine</b> | <b>1,125</b> | <b>6,267</b> | <b>1.3</b> | <b>2.5</b> | <b>0.44</b> | <b>(0.21 - 0.91)</b> |
| Flaxseed extract                                | supplement     | 189          | 7,203        | 4.3        | 9.9        | 0.44        | (0.17 - 1.18)        |
| Dextromethorphan                                | antitussive    | 900          | 6,492        | 0.8        | 2          | 0.45        | (0.17 - 1.17)        |
| Sildenafil                                      | PDE5 inhibitor | 182          | 7,210        | 3.7        | 7.6        | 0.51        | (0.18 - 1.45)        |
| Fexofenadine                                    | antihistamine  | 560          | 6,832        | 1.2        | 2.6        | 0.52        | (0.19 - 1.38)        |
| Methylprednisolone acetate                      | corticosteroid | 400          | 6,992        | 1.5        | 3.4        | 0.52        | (0.18 - 1.51)        |
| Naproxen                                        | NSAID          | 985          | 6,407        | 1.2        | 2.5        | 0.55        | (0.25 - 1.20)        |
| Clavulanate                                     | antibiotic     | 872          | 6,520        | 1.4        | 2.4        | 0.57        | (0.26 - 1.25)        |
| Pseudoephedrine                                 | decongestant   | 954          | 6,438        | 0.8        | 1.9        | 0.6         | (0.24 - 1.54)        |
| <b>*C Streptococcus pneumoniae type X</b>       | <b>vaccine</b> | <b>516</b>   | <b>6,876</b> | <b>3.7</b> | <b>5.9</b> | <b>0.61</b> | <b>(0.31 - 1.20)</b> |
| Omega-3 fatty acids                             | supplement     | 439          | 6,953        | 4          | 5.7        | 0.64        | (0.32 - 1.30)        |
| Ascorbic acid                                   | supplement     | 571          | 6,821        | 2.3        | 3.4        | 0.65        | (0.30 - 1.41)        |
| Bismuth subsalicylate                           | antidiarrheal  | 172          | 7,220        | 3.4        | 4.2        | 0.65        | (0.19 - 2.18)        |
| Fluticasone                                     | corticosteroid | 2,169        | 5,223        | 1.6        | 2.6        | 0.65        | (0.39 - 1.11)        |
| Varicella zoster virus glycoprotein E           | vaccine        | 223          | 7,169        | 3.3        | 6.8        | 0.66        | (0.23 - 1.89)        |
| Fluticasone propionate                          | corticosteroid | 902          | 6,490        | 1.6        | 2.5        | 0.66        | (0.32 - 1.39)        |
| Loratadine                                      | antihistamine  | 761          | 6,631        | 1.6        | 2.3        | 0.68        | (0.30 - 1.54)        |
| Meloxicam                                       | NSAID          | 595          | 6,797        | 2.1        | 3.7        | 0.69        | (0.32 - 1.49)        |
| Betamethasone                                   | corticosteroid | 238          | 7,154        | 2.5        | 3.6        | 0.72        | (0.23 - 2.24)        |
| Escitalopram                                    | antidepressant | 501          | 6,891        | 1.6        | 1.8        | 0.72        | (0.24 - 2.13)        |
| Ibuprofen                                       | NSAID          | 3,531        | 3,861        | 1.5        | 2.1        | 0.73        | (0.44 - 1.22)        |
| Ketoconazole                                    | antifungal     | 230          | 7,162        | 2.1        | 2.5        | 0.76        | (0.20 - 2.82)        |
| Diclofenac sodium                               | NSAID          | 343          | 7,049        | 3.6        | 4.9        | 0.8         | (0.35 - 1.80)        |
| Azelastine                                      | antihistamine  | 484          | 6,908        | 2.4        | 3.3        | 0.8         | (0.34 - 1.85)        |
| Ropivacaine                                     | anesthetic     | 221          | 7,171        | 3.2        | 4.2        | 0.81        | (0.28 - 2.39)        |
| Codeine                                         | opioid         | 345          | 7,047        | 2.7        | 4          | 0.81        | (0.32 - 2.08)        |
| Eicosapentaenoate                               | supplement     | 225          | 7,167        | 3.5        | 4.6        | 0.82        | (0.30 - 2.27)        |
| Tetracaine                                      | anesthetic     | 201          | 7,191        | 2.9        | 3.2        | 0.83        | (0.24 - 2.85)        |
| Zolpidem                                        | hypnotic       | 243          | 7,149        | 3.2        | 4.4        | 0.84        | (0.29 - 2.40)        |
| Lutein                                          | supplement     | 150          | 7,242        | 6.3        | 7.9        | 0.85        | (0.32 - 2.25)        |

|                         |                           |       |       |     |     |      |               |
|-------------------------|---------------------------|-------|-------|-----|-----|------|---------------|
| Duloxetine              | antidepressant            | 296   | 7,096 | 2.9 | 3.5 | 0.85 | (0.32 - 2.28) |
| Butalbital              | barbituate                | 349   | 7,043 | 2.2 | 2.8 | 0.86 | (0.31 - 2.37) |
| Vitamin B12             | supplement                | 676   | 6,716 | 3.3 | 3.5 | 0.88 | (0.45 - 1.72) |
| Tamsulosin              | alpha 1 blocker           | 222   | 7,170 | 6.7 | 7.5 | 0.88 | (0.38 - 2.03) |
| Valacyclovir            | antiviral                 | 455   | 6,937 | 1.7 | 2.4 | 0.88 | (0.32 - 2.43) |
| Amoxicillin             | antibiotic                | 1,721 | 5,671 | 1.7 | 1.8 | 0.89 | (0.48 - 1.62) |
| Folic acid              | supplement                | 422   | 6,970 | 3   | 2.8 | 0.89 | (0.37 - 2.15) |
| Diclofenac              | NSAID                     | 614   | 6,778 | 3.2 | 4.1 | 0.9  | (0.46 - 1.75) |
| Benzonatate             | antitussive               | 641   | 6,751 | 2.7 | 3.3 | 0.9  | (0.44 - 1.85) |
| Cetirizine              | antihistamine             | 1,396 | 5,996 | 1.7 | 2   | 0.9  | (0.47 - 1.71) |
| Testosterone            | androgen                  | 287   | 7,105 | 3.1 | 3.4 | 0.91 | (0.33 - 2.48) |
| Methylprednisolone      | corticosteroid            | 879   | 6,513 | 2.4 | 3   | 0.91 | (0.47 - 1.76) |
| Phenol                  | anesthetic                | 339   | 7,053 | 1.5 | 1.6 | 0.91 | (0.25 - 3.29) |
| Losartan                | antihypertensive          | 467   | 6,925 | 4.4 | 5.8 | 0.91 | (0.47 - 1.80) |
| Ketorolac               | NSAID                     | 556   | 6,836 | 1.9 | 2.5 | 0.92 | (0.38 - 2.21) |
| Alprazolam              | benzodiazepine            | 334   | 7,058 | 2.4 | 2.8 | 0.93 | (0.31 - 2.74) |
| Cefdinir                | antibiotic                | 300   | 7,092 | 2.3 | 1.7 | 0.93 | (0.26 - 3.35) |
| Tropicamide             | ophthalmic agent          | 354   | 7,038 | 3.8 | 3.7 | 0.95 | (0.41 - 2.23) |
| Adenosine monophosphate | antiarrhythmic agent      | 178   | 7,214 | 4.2 | 4.5 | 0.97 | (0.30 - 3.11) |
| Ranitidine              | antacid                   | 254   | 7,138 | 2.7 | 3   | 0.97 | (0.32 - 3.00) |
| Menthol                 | topical skin product      | 366   | 7,026 | 3.2 | 2.8 | 0.98 | (0.39 - 2.45) |
| Docosahexaenoate        | supplement                | 171   | 7,221 | 2.9 | 2.9 | 0.99 | (0.26 - 3.74) |
| Diethylstilbestrol      | estrogen                  | 175   | 7,217 | 6.1 | 7.1 | 0.99 | (0.38 - 2.58) |
| Fish oils               | supplement                | 445   | 6,947 | 4.1 | 4.3 | 0.99 | (0.49 - 2.03) |
| Pamidronate             | bisphosphonate derivative | 244   | 7,148 | 4.7 | 4.1 | 1    | (0.39 - 2.56) |
| Trazodone               | antidepressant            | 343   | 7,049 | 3.4 | 3.3 | 1    | (0.40 - 2.47) |
| Esomeprazole            | antacid                   | 172   | 7,220 | 3.4 | 4.2 | 1    | (0.30 - 3.37) |

Other abbreviations and acronyms. \*A Streptococcus pneumoniae serotype X: Streptococcus pneumoniae serotype (1, 19A, 3, 5, 6A, 7F) capsular antigen diphtheria CRM197 protein conjugate vaccine; \*B Streptococcus pneumoniae serotype X: Streptococcus pneumoniae serotype (14, 18C, 19F, 23F, 4, 6B, 9V) capsular antigen diphtheria CRM197 protein conjugate vaccine; \*C Streptococcus pneumoniae type X: Streptococcus pneumoniae type (1, 10A, 11A, 12F, 14, 15B, 17F, 18C, 19A, 19F, 2, 20, 22F, 23F, 3, 33F, 4, 5, 6B, 7F, 8, 9N, 9V) capsular polysaccharide antigen; NSAID: nonsteroidal anti-inflammatory drug; PDE5 inhibitor: phosphodiesterase type 5 inhibitor.

**eTable 7** Association between drug exposure and hospitalized-mild (cumulative severity).

**TCe/u**, total count of drug exposed/unexposed patients; **SRe/u**, severity rate of drug exposed/unexposed patients computed after overlap weighting with propensity score; **OR**, odds ratio; **CI**, confidence interval. The association results are arranged in the ascending order of OR values. The statistically significant results at the 0.05 level are emphasized in bold.

| Drug name                                       | Drug class                 | TCe          | TCu          | SRe         | SRu         | OR          | 95% CI               |
|-------------------------------------------------|----------------------------|--------------|--------------|-------------|-------------|-------------|----------------------|
| <b>Ethinyl estradiol</b>                        | <b>estrogen</b>            | <b>749</b>   | <b>7,019</b> | <b>1</b>    | <b>2.8</b>  | <b>0.37</b> | <b>(0.14 - 0.99)</b> |
| Clotrimazole                                    | antifungal                 | 160          | 7,608        | 4.3         | 9           | 0.4         | (0.14 - 1.15)        |
| <b>Turmeric extract</b>                         | <b>supplement</b>          | <b>154</b>   | <b>7,614</b> | <b>5.8</b>  | <b>14.2</b> | <b>0.4</b>  | <b>(0.17 - 0.98)</b> |
| Triamcinolone acetonide                         | corticosteroid             | 154          | 7,614        | 5.1         | 11.2        | 0.41        | (0.15 - 1.07)        |
| <b>Flaxseed extract</b>                         | <b>supplement</b>          | <b>206</b>   | <b>7,562</b> | <b>11.6</b> | <b>23.6</b> | <b>0.41</b> | <b>(0.22 - 0.77)</b> |
| Levonorgestrel                                  | estrogen                   | 507          | 7,261        | 1.2         | 3.4         | 0.42        | (0.15 - 1.18)        |
| Ubidecarenone                                   | supplement                 | 131          | 7,637        | 7.5         | 16.3        | 0.44        | (0.19 - 1.02)        |
| <b>*C Streptococcus pneumoniae type X</b>       | <b>vaccine</b>             | <b>552</b>   | <b>7,216</b> | <b>9.4</b>  | <b>16.8</b> | <b>0.47</b> | <b>(0.31 - 0.72)</b> |
| <b>Methylprednisolone acetate</b>               | <b>corticosteroid</b>      | <b>413</b>   | <b>7,355</b> | <b>4.5</b>  | <b>10</b>   | <b>0.48</b> | <b>(0.26 - 0.89)</b> |
| <b>*A Streptococcus pneumoniae serotype X</b>   | <b>vaccine</b>             | <b>419</b>   | <b>7,349</b> | <b>9.1</b>  | <b>14.9</b> | <b>0.49</b> | <b>(0.30 - 0.80)</b> |
| <b>Estradiol</b>                                | <b>estrogen derivative</b> | <b>576</b>   | <b>7,192</b> | <b>3.1</b>  | <b>6.2</b>  | <b>0.51</b> | <b>(0.26 - 0.97)</b> |
| Biotin                                          | supplement                 | 209          | 7,559        | 7.2         | 12.3        | 0.51        | (0.24 - 1.09)        |
| Estrogens                                       | estrogen                   | 316          | 7,452        | 4.4         | 8.5         | 0.53        | (0.26 - 1.09)        |
| <b>*B Streptococcus pneumoniae serotype X</b>   | <b>vaccine</b>             | <b>667</b>   | <b>7,101</b> | <b>9.4</b>  | <b>14.1</b> | <b>0.55</b> | <b>(0.37 - 0.82)</b> |
| Oseltamivir                                     | antiviral                  | 557          | 7,211        | 3.4         | 6           | 0.55        | (0.29 - 1.04)        |
| <b>Pseudoephedrine</b>                          | <b>decongestant</b>        | <b>978</b>   | <b>6,790</b> | <b>3.3</b>  | <b>6.3</b>  | <b>0.58</b> | <b>(0.35 - 0.94)</b> |
| <b>Omega-3 fatty acids</b>                      | <b>supplement</b>          | <b>475</b>   | <b>7,293</b> | <b>10.7</b> | <b>15.7</b> | <b>0.6</b>  | <b>(0.39 - 0.94)</b> |
| Psyllium                                        | antidiarrheal              | 116          | 7,652        | 6.8         | 11.4        | 0.61        | (0.22 - 1.67)        |
| Eicosapentaenoate                               | supplement                 | 237          | 7,531        | 8.2         | 13          | 0.61        | (0.32 - 1.18)        |
| Glucosamine                                     | supplement                 | 113          | 7,655        | 8.7         | 15.2        | 0.62        | (0.25 - 1.55)        |
| Haemophilus influenzae type b                   | vaccine                    | 373          | 7,395        | 4.5         | 6.7         | 0.64        | (0.32 - 1.27)        |
| Varicella zoster virus glycoprotein E           | vaccine                    | 241          | 7,527        | 10.3        | 17.6        | 0.64        | (0.35 - 1.19)        |
| Betamethasone                                   | corticosteroid             | 250          | 7,518        | 7.1         | 10.6        | 0.65        | (0.33 - 1.29)        |
| Azelastine                                      | antihistamine              | 507          | 7,261        | 6.7         | 10.1        | 0.66        | (0.40 - 1.10)        |
| Dextromethorphan                                | antitussive                | 933          | 6,835        | 4.3         | 6.6         | 0.66        | (0.42 - 1.06)        |
| <b>Tetanus toxoid vaccine, inactivated</b>      | <b>vaccine</b>             | <b>1,233</b> | <b>6,535</b> | <b>5.8</b>  | <b>8</b>    | <b>0.67</b> | <b>(0.47 - 0.97)</b> |
| Estrogens, conjugated (USP)                     | estrogens                  | 121          | 7,647        | 8.3         | 12.7        | 0.67        | (0.26 - 1.72)        |
| Fexofenadine                                    | antihistamine              | 586          | 7,182        | 5.5         | 8.3         | 0.67        | (0.40 - 1.12)        |
| <b>Ibuprofen</b>                                | <b>NSAID</b>               | <b>3,655</b> | <b>4,113</b> | <b>5.2</b>  | <b>7.4</b>  | <b>0.68</b> | <b>(0.51 - 0.90)</b> |
| <b>Fluticasone</b>                              | <b>corticosteroid</b>      | <b>2,271</b> | <b>5,497</b> | <b>5.7</b>  | <b>8.3</b>  | <b>0.68</b> | <b>(0.50 - 0.91)</b> |
| <b>Diphtheria toxoid vaccine, inactivated</b>   | <b>vaccine</b>             | <b>1,231</b> | <b>6,537</b> | <b>5.9</b>  | <b>8</b>    | <b>0.68</b> | <b>(0.48 - 0.98)</b> |
| Calcium citrate                                 | calcium salt               | 116          | 7,652        | 7.8         | 12          | 0.68        | (0.27 - 1.75)        |
| <b>Acellular pertussis vaccine, inactivated</b> | <b>vaccine</b>             | <b>1,181</b> | <b>6,587</b> | <b>5.9</b>  | <b>8</b>    | <b>0.69</b> | <b>(0.47 - 0.99)</b> |
| Naproxen                                        | NSAID                      | 1,029        | 6,739        | 5.3         | 8           | 0.69        | (0.46 - 1.03)        |

|                                                        |                             |       |       |      |      |      |               |
|--------------------------------------------------------|-----------------------------|-------|-------|------|------|------|---------------|
| Tadalafil                                              | PDE5 inhibitor              | 131   | 7,637 | 12.3 | 18.1 | 0.71 | (0.34 - 1.50) |
| Clobetasol                                             | corticosteroid              | 156   | 7,612 | 8.2  | 10.5 | 0.71 | (0.31 - 1.66) |
| Follicle stimulating hormone                           | gonadotropin                | 134   | 7,634 | 4.5  | 6.6  | 0.73 | (0.23 - 2.30) |
| Nitrofurantoin, monohydrate                            | antibiotic                  | 210   | 7,558 | 4.8  | 6.6  | 0.73 | (0.28 - 1.87) |
| Cetirizine                                             | antihistamine               | 1,447 | 6,321 | 5.1  | 7    | 0.73 | (0.51 - 1.05) |
| Fluticasone propionate                                 | corticosteroid              | 947   | 6,821 | 6.2  | 8    | 0.73 | (0.49 - 1.10) |
| Phentermine                                            | anorexiant                  | 123   | 7,645 | 5    | 6.5  | 0.74 | (0.22 - 2.47) |
| Sildenafil                                             | PDE5 inhibitor              | 203   | 7,565 | 13.8 | 18.3 | 0.76 | (0.41 - 1.39) |
| Loratadine                                             | antihistamine               | 797   | 6,971 | 5.9  | 7.7  | 0.76 | (0.48 - 1.18) |
| Lutein                                                 | supplement                  | 167   | 7,601 | 15.9 | 20   | 0.78 | (0.41 - 1.46) |
| Adalimumab                                             | DMARD                       | 132   | 7,636 | 6    | 8.4  | 0.78 | (0.28 - 2.15) |
| Lamotrigine                                            | anticonvulsant              | 160   | 7,608 | 5    | 6.1  | 0.78 | (0.27 - 2.24) |
| Vitamin B12                                            | supplement                  | 728   | 7,040 | 9.6  | 11.3 | 0.8  | (0.54 - 1.19) |
| Naproxen sodium                                        | NSAID                       | 137   | 7,631 | 7.9  | 10   | 0.8  | (0.33 - 1.97) |
| Testosterone                                           | androgen                    | 302   | 7,466 | 7.8  | 9.8  | 0.81 | (0.43 - 1.51) |
| Benzonatate                                            | antitussive                 | 680   | 7,088 | 8.1  | 10.1 | 0.82 | (0.53 - 1.24) |
| Cortisone                                              | corticosteroid              | 179   | 7,589 | 9.3  | 11.9 | 0.82 | (0.39 - 1.72) |
| Diethylstilbestrol                                     | estrogen                    | 193   | 7,575 | 14.7 | 18.1 | 0.82 | (0.45 - 1.50) |
| Diclofenac sodium                                      | NSAID                       | 375   | 7,393 | 11.4 | 13.9 | 0.85 | (0.53 - 1.39) |
| Lufenuron                                              | antiparasitic/antifungal    | 217   | 7,551 | 9.5  | 10.3 | 0.87 | (0.44 - 1.71) |
| Oxymetazoline                                          | adrenergic agonist agent    | 1,206 | 6,562 | 6.6  | 7.1  | 0.87 | (0.61 - 1.26) |
| Fish oils                                              | supplement                  | 479   | 7,289 | 10.7 | 12.4 | 0.88 | (0.56 - 1.38) |
| Meloxicam                                              | NSAID                       | 640   | 7,128 | 8.7  | 10.7 | 0.9  | (0.59 - 1.37) |
| Finasteride                                            | 5-alpha reductase inhibitor | 106   | 7,662 | 13.8 | 15   | 0.91 | (0.39 - 2.09) |
| Ascorbic acid                                          | supplement                  | 618   | 7,150 | 9.5  | 10.3 | 0.91 | (0.59 - 1.38) |
| Desoxycorticosterone                                   | corticosteroid              | 159   | 7,609 | 11.2 | 12   | 0.92 | (0.43 - 1.96) |
| Tretinoin                                              | antineoplastic agent        | 230   | 7,538 | 3.5  | 4.4  | 0.92 | (0.33 - 2.58) |
| Ketoconazole                                           | antifungal                  | 244   | 7,524 | 7.7  | 8    | 0.93 | (0.45 - 1.89) |
| Norethindrone                                          | contraceptive               | 441   | 7,327 | 2.6  | 3.1  | 0.93 | (0.38 - 2.28) |
| Methylprednisolone                                     | corticosteroid              | 933   | 6,835 | 7.9  | 9.3  | 0.93 | (0.64 - 1.35) |
| Varicella-zoster virus vaccine live (Oka-Merck) strain | vaccine                     | 165   | 7,603 | 9.7  | 8.4  | 0.94 | (0.41 - 2.14) |
| Fiber                                                  | supplement                  | 699   | 7,069 | 7.4  | 8.3  | 0.94 | (0.61 - 1.45) |
| Docosahexaenoate                                       | supplement                  | 181   | 7,587 | 8.3  | 8.9  | 0.94 | (0.43 - 2.05) |
| Thioguanine                                            | antineoplastic agent        | 252   | 7,516 | 12.4 | 13.6 | 0.94 | (0.53 - 1.68) |
| Celecoxib                                              | NSAID                       | 182   | 7,586 | 11.4 | 12.9 | 0.94 | (0.47 - 1.89) |
| Mometasone                                             | corticosteroid              | 222   | 7,546 | 8.5  | 9.6  | 0.95 | (0.46 - 1.95) |
| Diclofenac                                             | NSAID                       | 667   | 7,101 | 10.5 | 11.8 | 0.95 | (0.65 - 1.40) |
| Phenol                                                 | anesthetic                  | 354   | 7,414 | 5.7  | 5.8  | 0.97 | (0.49 - 1.92) |
| Metoprolol succinate                                   | antihypertensive            | 195   | 7,573 | 16.3 | 17.3 | 0.98 | (0.54 - 1.77) |



|                                                |             |       |       |     |     |      |               |
|------------------------------------------------|-------------|-------|-------|-----|-----|------|---------------|
| Hepatitis A vaccine (inactivated) strain HM175 | vaccine     | 189   | 7,579 | 7.4 | 6.8 | 0.99 | (0.41 - 2.35) |
| Hepatitis A Vaccine, Inactivated               | vaccine     | 166   | 7,602 | 6   | 5.8 | 0.99 | (0.36 - 2.73) |
| Valacyclovir                                   | antiviral   | 482   | 7,286 | 7.2 | 8   | 1    | (0.58 - 1.71) |
| Guaifenesin                                    | expectorant | 1,293 | 6,475 | 8.3 | 8.1 | 1    | (0.71 - 1.40) |

Other abbreviations and acronyms. \*A Streptococcus pneumoniae serotype X: Streptococcus pneumoniae serotype (1, 19A, 3, 5, 6A, 7F) capsular antigen diphtheria CRM197 protein conjugate vaccine; \*B Streptococcus pneumoniae serotype X: Streptococcus pneumoniae serotype (14, 18C, 19F, 23F, 4, 6B, 9V) capsular antigen diphtheria CRM197 protein conjugate vaccine; \*C Streptococcus pneumoniae type X: Streptococcus pneumoniae type (1, 10A, 11A, 12F, 14, 15B, 17F, 18C, 19A, 19F, 2, 20, 22F, 23F, 3, 33F, 4, 5, 6B, 7F, 8, 9N, 9V) capsular polysaccharide antigen; NSAID: nonsteroidal anti-inflammatory drug; PDE5 inhibitor: phosphodiesterase type 5 inhibitor; DMARD: disease-modifying antirheumatic drugs.

**eTable 8** Association between drug exposure and on ventilator (exclusive severity).

**TCe/u**, total count of drug exposed/unexposed patients; **SRe/u**, severity rate of drug exposed/unexposed patients computed after overlap weighting with propensity score; **OR**, odds ratio; **CI**, confidence interval. The association results are arranged in the ascending order of OR values.

| Drug name                                | Drug class       | TCe   | TCu   | SRe | SRu | OR   | 95% CI        |
|------------------------------------------|------------------|-------|-------|-----|-----|------|---------------|
| *A Streptococcus pneumoniae serotype X   | vaccine          | 384   | 6,928 | 1.3 | 2.1 | 0.52 | (0.15 - 1.81) |
| Tetanus toxoid vaccine, inactivated      | vaccine          | 1,168 | 6,144 | 0.7 | 1.1 | 0.53 | (0.19 - 1.44) |
| Diphtheria toxoid vaccine, inactivated   | vaccine          | 1,165 | 6,147 | 0.7 | 1.1 | 0.53 | (0.19 - 1.44) |
| Acellular pertussis vaccine, inactivated | vaccine          | 1,118 | 6,194 | 0.7 | 1.1 | 0.55 | (0.20 - 1.52) |
| Ascorbic acid                            | supplement       | 562   | 6,750 | 0.8 | 1.4 | 0.59 | (0.17 - 2.03) |
| Vitamin B12                              | supplement       | 657   | 6,655 | 0.9 | 1.4 | 0.6  | (0.19 - 1.86) |
| *B Streptococcus pneumoniae serotype X   | vaccine          | 608   | 6,704 | 1.4 | 1.9 | 0.62 | (0.23 - 1.69) |
| Fluticasone                              | corticosteroid   | 2,147 | 5,165 | 0.7 | 1.2 | 0.65 | (0.30 - 1.41) |
| Ibuprofen                                | NSAID            | 3,505 | 3,807 | 0.7 | 1   | 0.69 | (0.32 - 1.46) |
| Cetirizine                               | antihistamine    | 1,381 | 5,931 | 0.6 | 0.9 | 0.7  | (0.27 - 1.85) |
| Amlodipine                               | antihypertensive | 474   | 6,838 | 1.8 | 2.7 | 0.73 | (0.27 - 1.93) |
| Losartan                                 | antihypertensive | 451   | 6,861 | 1.6 | 2.4 | 0.73 | (0.26 - 2.07) |
| Amoxicillin                              | antibiotic       | 1,703 | 5,609 | 0.7 | 0.9 | 0.74 | (0.30 - 1.84) |
| Fluticasone propionate                   | corticosteroid   | 894   | 6,418 | 0.8 | 1.1 | 0.74 | (0.25 - 2.18) |
| Sildenafil                               | PDE5 inhibitor   | 180   | 7,132 | 2.6 | 3.4 | 0.81 | (0.21 - 3.16) |
| Benzonatate                              | antitussive      | 630   | 6,682 | 1.1 | 1.3 | 0.82 | (0.27 - 2.45) |
| Tamsulosin                               | alpha 1 blocker  | 212   | 7,100 | 3.2 | 3.7 | 0.85 | (0.26 - 2.73) |
| Naproxen                                 | NSAID            | 981   | 6,331 | 0.8 | 1   | 0.88 | (0.31 - 2.47) |
| Omega-3 fatty acids                      | supplement       | 429   | 6,883 | 2.1 | 2.2 | 0.89 | (0.32 - 2.47) |
| Ketorolac                                | NSAID            | 550   | 6,762 | 0.9 | 1.1 | 0.89 | (0.25 - 3.22) |
| Tropicamide                              | ophthalmic agent | 345   | 6,967 | 1.4 | 1.5 | 0.9  | (0.24 - 3.43) |
| Meloxicam                                | NSAID            | 589   | 6,723 | 1.1 | 1.4 | 0.94 | (0.31 - 2.86) |
| Dexamethasone                            | corticosteroid   | 880   | 6,432 | 1   | 1.1 | 0.97 | (0.36 - 2.62) |
| *C Streptococcus pneumoniae type X       | vaccine          | 505   | 6,807 | 2.1 | 2.1 | 0.99 | (0.38 - 2.60) |

Other abbreviations and acronyms. \*A Streptococcus pneumoniae serotype X: Streptococcus pneumoniae serotype (1, 19A, 3, 5, 6A, 7F) capsular antigen diphtheria CRM197 protein conjugate vaccine; \*B Streptococcus pneumoniae serotype X: Streptococcus pneumoniae serotype (14, 18C, 19F, 23F, 4, 6B, 9V) capsular antigen diphtheria CRM197 protein conjugate vaccine; \*C Streptococcus pneumoniae type X: Streptococcus pneumoniae type (1, 10A, 11A, 12F, 14, 15B, 17F, 18C, 19A, 19F, 2, 20, 22F, 23F, 3, 33F, 4, 5, 6B, 7F, 8, 9N, 9V) capsular polysaccharide antigen; NSAID: nonsteroidal anti-inflammatory drug; PDE5 inhibitor: phosphodiesterase type 5 inhibitor.

**eTable 9** Association between drug exposure and in ICU (exclusive severity).

**TCe/u**, total count of drug exposed/unexposed patients; **SRe/u**, severity rate of drug exposed/unexposed patients computed after overlap weighting with propensity score; **OR**, odds ratio; **CI**, confidence interval. The association results are arranged in the ascending order of OR values. The statistically significant results at the 0.05 level are emphasized in bold.

| Drug name                                       | Drug class       | TCe          | TCu          | SRe        | SRu        | OR          | 95% CI               |
|-------------------------------------------------|------------------|--------------|--------------|------------|------------|-------------|----------------------|
| <b>Diphtheria toxoid vaccine, inactivated</b>   | <b>vaccine</b>   | <b>1,164</b> | <b>6,166</b> | <b>0.6</b> | <b>1.5</b> | <b>0.34</b> | <b>(0.12 - 0.93)</b> |
| <b>Tetanus toxoid vaccine, inactivated</b>      | <b>vaccine</b>   | <b>1,167</b> | <b>6,163</b> | <b>0.6</b> | <b>1.5</b> | <b>0.34</b> | <b>(0.12 - 0.93)</b> |
| <b>Acellular pertussis vaccine, inactivated</b> | <b>vaccine</b>   | <b>1,117</b> | <b>6,213</b> | <b>0.6</b> | <b>1.5</b> | <b>0.35</b> | <b>(0.13 - 0.97)</b> |
| Naproxen                                        | NSAID            | 978          | 6,352        | 0.5        | 1.5        | 0.4         | (0.13 - 1.22)        |
| *A Streptococcus pneumoniae serotype X          | vaccine          | 385          | 6,945        | 1.4        | 2.6        | 0.42        | (0.13 - 1.35)        |
| *B Streptococcus pneumoniae serotype X          | vaccine          | 609          | 6,721        | 1.5        | 2.5        | 0.46        | (0.18 - 1.19)        |
| Flaxseed extract                                | supplement       | 185          | 7,145        | 2.3        | 3.8        | 0.62        | (0.16 - 2.38)        |
| Fluticasone propionate                          | corticosteroid   | 895          | 6,435        | 0.9        | 1.4        | 0.63        | (0.24 - 1.69)        |
| *C Streptococcus pneumoniae type X              | vaccine          | 505          | 6,825        | 1.9        | 2.8        | 0.65        | (0.26 - 1.66)        |
| Sildenafil                                      | PDE5 inhibitor   | 180          | 7,150        | 2.8        | 4.2        | 0.68        | (0.19 - 2.37)        |
| Dextromethorphan                                | antitussive      | 899          | 6,431        | 0.7        | 1.1        | 0.68        | (0.22 - 2.06)        |
| Amoxicillin                                     | antibiotic       | 1,706        | 5,624        | 0.8        | 1.1        | 0.68        | (0.30 - 1.54)        |
| Clavulanate                                     | antibiotic       | 868          | 6,462        | 0.9        | 1.3        | 0.68        | (0.25 - 1.84)        |
| Diclofenac sodium                               | NSAID            | 336          | 6,994        | 1.8        | 2.5        | 0.72        | (0.24 - 2.22)        |
| Thyrotropin                                     | thyroid product  | 468          | 6,862        | 1.1        | 1.4        | 0.74        | (0.21 - 2.58)        |
| Morphine sulfate                                | opioid           | 659          | 6,671        | 1.3        | 1.6        | 0.76        | (0.29 - 2.04)        |
| Cetirizine                                      | antihistamine    | 1,384        | 5,946        | 0.9        | 1.2        | 0.78        | (0.33 - 1.82)        |
| Fluticasone                                     | corticosteroid   | 2,155        | 5,175        | 1.1        | 1.4        | 0.79        | (0.41 - 1.54)        |
| Omega-3 fatty acids                             | supplement       | 430          | 6,900        | 2.1        | 2.6        | 0.79        | (0.30 - 2.11)        |
| Tropicamide                                     | ophthalmic agent | 346          | 6,984        | 1.7        | 2          | 0.8         | (0.25 - 2.60)        |
| Fexofenadine                                    | antihistamine    | 559          | 6,771        | 1          | 1.4        | 0.81        | (0.26 - 2.56)        |
| Dexamethasone                                   | corticosteroid   | 881          | 6,449        | 1.1        | 1.5        | 0.82        | (0.33 - 2.06)        |
| Vitamin B12                                     | supplement       | 662          | 6,668        | 1.7        | 1.9        | 0.84        | (0.34 - 2.05)        |
| Fish oils                                       | supplement       | 434          | 6,896        | 1.8        | 2.2        | 0.84        | (0.30 - 2.33)        |
| Calcium carbonate                               | supplement       | 307          | 7,023        | 1.6        | 2          | 0.84        | (0.23 - 3.01)        |
| Vitamin D                                       | supplement       | 1,408        | 5,922        | 1.2        | 1.4        | 0.85        | (0.40 - 1.81)        |
| Ketorolac                                       | NSAID            | 551          | 6,779        | 1.1        | 1.4        | 0.86        | (0.27 - 2.71)        |
| Diclofenac                                      | NSAID            | 604          | 6,726        | 1.8        | 2.2        | 0.86        | (0.36 - 2.06)        |
| Meloxicam                                       | NSAID            | 591          | 6,739        | 1.5        | 1.9        | 0.86        | (0.33 - 2.26)        |
| Loratadine                                      | antihistamine    | 757          | 6,573        | 1          | 1.3        | 0.87        | (0.31 - 2.40)        |
| Iron                                            | supplement       | 1,230        | 6,100        | 1.1        | 1.1        | 0.89        | (0.37 - 2.14)        |
| Azelastine                                      | antihistamine    | 479          | 6,851        | 1.4        | 1.7        | 0.89        | (0.30 - 2.67)        |
| Pseudoephedrine                                 | decongestant     | 953          | 6,377        | 0.7        | 1.1        | 0.91        | (0.31 - 2.65)        |
| Methylprednisolone                              | corticosteroid   | 869          | 6,461        | 1.3        | 1.6        | 0.92        | (0.38 - 2.21)        |

|                                       |                          |       |       |     |     |      |               |
|---------------------------------------|--------------------------|-------|-------|-----|-----|------|---------------|
| Cephapirin                            | antibiotic               | 520   | 6,810 | 1.5 | 1.4 | 0.92 | (0.31 - 2.77) |
| Doxycycline                           | antibiotic               | 690   | 6,640 | 1.4 | 1.5 | 0.93 | (0.36 - 2.40) |
| Ibuprofen                             | NSAID                    | 3,516 | 3,814 | 1   | 1.2 | 0.93 | (0.49 - 1.77) |
| Trazodone                             | antidepressant           | 337   | 6,993 | 1.8 | 1.7 | 0.95 | (0.28 - 3.24) |
| Oxymetazoline                         | adrenergic agonist agent | 1,140 | 6,190 | 1.2 | 1.2 | 0.95 | (0.41 - 2.20) |
| Amlodipine                            | antihypertensive         | 480   | 6,850 | 2.9 | 3.3 | 0.96 | (0.42 - 2.18) |
| Zolpidem                              | hypnotic                 | 240   | 7,090 | 2.1 | 2.1 | 0.97 | (0.25 - 3.68) |
| Tamsulosin                            | alpha 1 blocker          | 214   | 7,116 | 4   | 4.1 | 0.97 | (0.33 - 2.83) |
| Folic acid                            | supplement               | 416   | 6,914 | 1.7 | 1.5 | 0.97 | (0.31 - 3.08) |
| Varicella zoster virus glycoprotein E | vaccine                  | 221   | 7,109 | 2.6 | 3.1 | 0.97 | (0.27 - 3.47) |
| Ascorbic acid                         | supplement               | 567   | 6,763 | 1.7 | 1.7 | 0.99 | (0.38 - 2.59) |

Other abbreviations and acronyms. \*A Streptococcus pneumoniae serotype X: Streptococcus pneumoniae serotype (1, 19A, 3, 5, 6A, 7F) capsular antigen diphtheria CRM197 protein conjugate vaccine; \*B Streptococcus pneumoniae serotype X: Streptococcus pneumoniae serotype (14, 18C, 19F, 23F, 4, 6B, 9V) capsular antigen diphtheria CRM197 protein conjugate vaccine; \*C Streptococcus pneumoniae type X: Streptococcus pneumoniae type (1, 10A, 11A, 12F, 14, 15B, 17F, 18C, 19A, 19F, 2, 20, 22F, 23F, 3, 33F, 4, 5, 6B, 7F, 8, 9N, 9V) capsular polysaccharide antigen; NSAID: nonsteroidal anti-inflammatory drug; PDE5 inhibitor: phosphodiesterase type 5 inhibitor.

**eTable 10** Association between drug exposure and hospitalized-mild (exclusive severity).

**TCe/u**, total count of drug exposed/unexposed patients; **SRe/u**, severity rate of drug exposed/unexposed patients computed after overlap weighting with propensity score; **OR**, odds ratio; **CI**, confidence interval. The association results are arranged in the ascending order of OR values. The statistically significant results at the 0.05 level are emphasized in bold.

| Drug name                                     | Drug class            | TCe          | TCu          | SRe        | SRu         | OR          | 95% CI               |
|-----------------------------------------------|-----------------------|--------------|--------------|------------|-------------|-------------|----------------------|
| <b>Turmeric extract</b>                       | <b>supplement</b>     | <b>150</b>   | <b>7,474</b> | <b>3.3</b> | <b>10.4</b> | <b>0.32</b> | <b>(0.11 - 0.97)</b> |
| Ethinyl estradiol                             | estrogen              | 748          | 6,876        | 0.8        | 2.3         | 0.4         | (0.14 - 1.17)        |
| <b>Flaxseed extract</b>                       | <b>supplement</b>     | <b>197</b>   | <b>7,427</b> | <b>7.9</b> | <b>17.3</b> | <b>0.4</b>  | <b>(0.19 - 0.84)</b> |
| <b>*C Streptococcus pneumoniae type X</b>     | <b>vaccine</b>        | <b>529</b>   | <b>7,095</b> | <b>6.1</b> | <b>12.6</b> | <b>0.42</b> | <b>(0.25 - 0.69)</b> |
| Clotrimazole                                  | antifungal            | 158          | 7,466        | 3.1        | 6.6         | 0.44        | (0.13 - 1.43)        |
| <b>Methylprednisolone acetate</b>             | <b>corticosteroid</b> | <b>407</b>   | <b>7,217</b> | <b>3.2</b> | <b>7.5</b>  | <b>0.46</b> | <b>(0.22 - 0.94)</b> |
| Eicosapentaenoate                             | supplement            | 229          | 7,395        | 5          | 9.6         | 0.5         | (0.23 - 1.12)        |
| <b>*A Streptococcus pneumoniae serotype X</b> | <b>vaccine</b>        | <b>407</b>   | <b>7,217</b> | <b>6.6</b> | <b>11</b>   | <b>0.52</b> | <b>(0.30 - 0.91)</b> |
| Glucosamine                                   | supplement            | 109          | 7,515        | 5.4        | 11.2        | 0.52        | (0.17 - 1.61)        |
| Estradiol                                     | estrogen derivative   | 572          | 7,052        | 2.5        | 4.8         | 0.52        | (0.25 - 1.08)        |
| Psyllium                                      | antidiarrheal         | 113          | 7,511        | 4.4        | 8.3         | 0.54        | (0.16 - 1.83)        |
| <b>Omega-3 fatty acids</b>                    | <b>supplement</b>     | <b>456</b>   | <b>7,168</b> | <b>7.2</b> | <b>11.5</b> | <b>0.56</b> | <b>(0.33 - 0.95)</b> |
| Ubidecarenone                                 | supplement            | 130          | 7,494        | 6.8        | 12.1        | 0.56        | (0.23 - 1.41)        |
| <b>Pseudoephedrine</b>                        | <b>decongestant</b>   | <b>970</b>   | <b>6,654</b> | <b>2.5</b> | <b>4.7</b>  | <b>0.57</b> | <b>(0.33 - 0.99)</b> |
| Triamcinolone acetonide                       | corticosteroid        | 154          | 7,470        | 5.1        | 8.3         | 0.57        | (0.21 - 1.56)        |
| Biotin                                        | supplement            | 206          | 7,418        | 5.8        | 9.2         | 0.58        | (0.25 - 1.32)        |
| Estrogens                                     | estrogen              | 314          | 7,310        | 3.7        | 6.6         | 0.58        | (0.26 - 1.29)        |
| <b>*B Streptococcus pneumoniae serotype X</b> | <b>vaccine</b>        | <b>647</b>   | <b>6,977</b> | <b>7</b>   | <b>10.4</b> | <b>0.59</b> | <b>(0.38 - 0.93)</b> |
| Clobetasol                                    | corticosteroid        | 151          | 7,473        | 5.2        | 7.7         | 0.59        | (0.22 - 1.62)        |
| Azelastine                                    | antihistamine         | 495          | 7,129        | 4.5        | 7.4         | 0.61        | (0.33 - 1.10)        |
| Betamethasone                                 | corticosteroid        | 244          | 7,380        | 4.9        | 7.8         | 0.62        | (0.28 - 1.36)        |
| Oseltamivir                                   | antiviral             | 554          | 7,070        | 2.9        | 4.5         | 0.64        | (0.32 - 1.27)        |
| Calcium citrate                               | calcium salt          | 113          | 7,511        | 5.3        | 8.8         | 0.64        | (0.22 - 1.92)        |
| Varicella zoster virus glycoprotein E         | vaccine               | 233          | 7,391        | 7.3        | 12.9        | 0.65        | (0.32 - 1.31)        |
| <b>Ibuprofen</b>                              | <b>NSAID</b>          | <b>3,608</b> | <b>4,016</b> | <b>3.7</b> | <b>5.6</b>  | <b>0.65</b> | <b>(0.47 - 0.90)</b> |
| Estrogens, conjugated (USP)                   | estrogens             | 118          | 7,506        | 5.9        | 9.4         | 0.65        | (0.22 - 1.90)        |
| Nitrofurantoin, monohydrate                   | antibiotic            | 207          | 7,417        | 3.4        | 5.1         | 0.65        | (0.22 - 1.94)        |
| Cetirizine                                    | antihistamine         | 1,423        | 6,201        | 3.5        | 5.2         | 0.68        | (0.44 - 1.03)        |
| <b>Fluticasone</b>                            | <b>corticosteroid</b> | <b>2,232</b> | <b>5,392</b> | <b>4.2</b> | <b>6.1</b>  | <b>0.68</b> | <b>(0.48 - 0.95)</b> |
| Lutein                                        | supplement            | 157          | 7,467        | 10.7       | 14.7        | 0.71        | (0.34 - 1.48)        |
| Lamotrigine                                   | anticonvulsant        | 157          | 7,467        | 3.2        | 4.4         | 0.72        | (0.21 - 2.47)        |
| Diethylstilbestrol                            | estrogen              | 182          | 7,442        | 9.7        | 13.2        | 0.72        | (0.35 - 1.47)        |
| Testosterone                                  | androgen              | 293          | 7,331        | 5          | 7.1         | 0.72        | (0.34 - 1.52)        |
| Fexofenadine                                  | antihistamine         | 579          | 7,045        | 4.4        | 6.1         | 0.73        | (0.41 - 1.30)        |

|                                                        |                          |       |       |      |      |      |               |
|--------------------------------------------------------|--------------------------|-------|-------|------|------|------|---------------|
| Naproxen                                               | NSAID                    | 1,017 | 6,607 | 4.2  | 5.9  | 0.74 | (0.47 - 1.16) |
| Dextromethorphan                                       | antitussive              | 926   | 6,698 | 3.6  | 4.9  | 0.75 | (0.45 - 1.26) |
| Fluticasone propionate                                 | corticosteroid           | 932   | 6,692 | 4.7  | 5.9  | 0.76 | (0.48 - 1.20) |
| Tetanus toxoid vaccine, inactivated                    | vaccine                  | 1,218 | 6,406 | 4.6  | 5.9  | 0.76 | (0.50 - 1.14) |
| Acellular pertussis vaccine, inactivated               | vaccine                  | 1,166 | 6,458 | 4.7  | 5.9  | 0.77 | (0.51 - 1.15) |
| Benzonatate                                            | antitussive              | 662   | 6,962 | 5.7  | 7.5  | 0.77 | (0.47 - 1.25) |
| Mometasone                                             | corticosteroid           | 214   | 7,410 | 5.1  | 7    | 0.77 | (0.32 - 1.83) |
| Vitamin B12                                            | supplement               | 702   | 6,922 | 6.8  | 8.4  | 0.77 | (0.49 - 1.22) |
| Diphtheria toxoid vaccine, inactivated                 | vaccine                  | 1,216 | 6,408 | 4.7  | 5.9  | 0.77 | (0.52 - 1.16) |
| Naproxen sodium                                        | NSAID                    | 134   | 7,490 | 5.9  | 7.4  | 0.78 | (0.28 - 2.19) |
| Haemophilus influenzae type b                          | vaccine                  | 371   | 7,253 | 4    | 5    | 0.78 | (0.37 - 1.66) |
| Oxymetazoline                                          | adrenergic agonist agent | 1,179 | 6,445 | 4.4  | 5.3  | 0.79 | (0.51 - 1.21) |
| Loratadine                                             | antihistamine            | 785   | 6,839 | 4.5  | 5.7  | 0.79 | (0.48 - 1.31) |
| Varicella-zoster virus vaccine live (Oka-Merck) strain | vaccine                  | 158   | 7,466 | 5.7  | 6    | 0.79 | (0.29 - 2.15) |
| Metoprolol succinate                                   | antihypertensive         | 181   | 7,443 | 10.1 | 12.5 | 0.8  | (0.39 - 1.63) |
| Fish oils                                              | supplement               | 460   | 7,164 | 7.1  | 9.1  | 0.8  | (0.47 - 1.36) |
| *D Neisseria meningitidis serogroup X                  | vaccine                  | 171   | 7,453 | 2.9  | 3.5  | 0.82 | (0.23 - 2.99) |
| Fiber                                                  | supplement               | 681   | 6,943 | 5    | 6.2  | 0.85 | (0.51 - 1.40) |
| Diclofenac sodium                                      | NSAID                    | 362   | 7,262 | 8.3  | 10.3 | 0.85 | (0.49 - 1.48) |
| Docosahexaenoate                                       | supplement               | 176   | 7,448 | 5.7  | 6.6  | 0.85 | (0.34 - 2.13) |
| Sodium sulfate                                         | laxative                 | 188   | 7,436 | 8.4  | 10.2 | 0.86 | (0.40 - 1.84) |
| Sildenafil                                             | PDE5 inhibitor           | 196   | 7,428 | 10.9 | 13.1 | 0.86 | (0.43 - 1.74) |
| Norethindrone                                          | contraceptive            | 438   | 7,186 | 1.9  | 2.5  | 0.86 | (0.31 - 2.41) |
| Tadalafil                                              | PDE5 inhibitor           | 128   | 7,496 | 10.4 | 13.2 | 0.87 | (0.38 - 2.01) |
| Cortisone                                              | corticosteroid           | 175   | 7,449 | 7.3  | 8.7  | 0.89 | (0.39 - 2.03) |
| Thioguanine                                            | antineoplastic agent     | 242   | 7,382 | 8.8  | 10   | 0.89 | (0.46 - 1.73) |
| Tretinoin                                              | antineoplastic agent     | 228   | 7,396 | 2.7  | 3.4  | 0.9  | (0.28 - 2.86) |
| Methylprednisolone                                     | corticosteroid           | 911   | 6,713 | 5.8  | 6.8  | 0.92 | (0.60 - 1.40) |
| Diclofenac                                             | NSAID                    | 646   | 6,978 | 7.7  | 8.7  | 0.94 | (0.60 - 1.46) |
| Hydrochlorothiazide                                    | antihypertensive         | 767   | 6,857 | 9.7  | 11.1 | 0.96 | (0.65 - 1.41) |
| Ketoconazole                                           | antifungal               | 239   | 7,385 | 5.8  | 5.9  | 0.96 | (0.43 - 2.15) |
| Meloxicam                                              | NSAID                    | 627   | 6,997 | 6.9  | 7.9  | 0.96 | (0.60 - 1.54) |
| Phenol                                                 | anesthetic               | 349   | 7,275 | 4.3  | 4.4  | 0.96 | (0.44 - 2.10) |
| Hepatitis A vaccine (inactivated) strain HM175         | vaccine                  | 185   | 7,439 | 5.4  | 5.1  | 0.97 | (0.36 - 2.63) |
| Methocarbamol                                          | skeletal muscle relaxant | 163   | 7,461 | 7.3  | 8.3  | 0.98 | (0.40 - 2.39) |
| Lufenuron                                              | antiparasitic/antifungal | 213   | 7,411 | 7.9  | 7.6  | 0.99 | (0.47 - 2.10) |
| Ascorbic acid                                          | supplement               | 604   | 7,020 | 7.5  | 7.5  | 1    | (0.62 - 1.60) |
| Guaifenesin                                            | expectorant              | 1,260 | 6,364 | 6    | 5.9  | 1    | (0.68 - 1.47) |
| Amlodipine                                             | antihypertensive         | 530   | 7,094 | 11.3 | 12.2 | 1    | (0.65 - 1.54) |

Other abbreviations and acronyms. \*A Streptococcus pneumoniae serotype X: Streptococcus pneumoniae serotype (1, 19A, 3, 5, 6A, 7F) capsular antigen diphtheria CRM197 protein conjugate vaccine; \*B Streptococcus pneumoniae serotype X: Streptococcus pneumoniae serotype (14, 18C, 19F, 23F, 4, 6B, 9V) capsular antigen diphtheria CRM197 protein conjugate vaccine; \*C Streptococcus pneumoniae type X: Streptococcus pneumoniae type (1, 10A, 11A, 12F, 14, 15B, 17F, 18C, 19A, 19F, 2, 20, 22F, 23F, 3, 33F, 4, 5, 6B, 7F, 8, 9N, 9V) capsular polysaccharide antigen; \*D Neisseria meningitidis serogroup X: Neisseria meningitidis serogroup (C, W-135, Y) capsular polysaccharide diphtheria toxoid protein conjugate vaccine; NSAID: nonsteroidal anti-inflammatory drug; PDE5 inhibitor: phosphodiesterase type 5 inhibitor.
